# Supplementary material for: Efficient organic carbon burial in the Bengal fan sustained by the Himalayan erosional system
Source: Springer Nature journal article supplement (doi:10.1038/nature06273), 2007-11-15
Supplement: 41586_2007_BFnature06273_MOESM251_ESM.pdf [file 41586_2007_BFnature06273_MOESM251_ESM.pdf]

### Detection of fossil Organic Carbon

Fossil organic carbon has been identified and characterized by Raman microspectroscopy and High-Resolution Transmission Electron Microscopy (HRTEM) in all suspended and bed loads river sediments as well as in oceanic sediment samples, even in samples with high  $\Delta^{14}\text{C}$ . On Figure S3, representative Raman spectra of metamorphic Carbonaceous Material (CM) from river and oceanic sediments are depicted; these spectra were obtained on CM particles with at least micrometric dimensions. The general shape of these Raman spectra, in particular the intensity of defect bands relatively to the graphite band, shows some heterogeneity, but is systematically representative of graphitic CM with various degrees of structural organization (graphitization). In most cases, these spectra are highly similar to those observed by Beyssac et al.<sup>36</sup> in CM contained in metasedimentary rocks collected in the Lesser Himalaya of Nepal. Such CM were observed as isolated particles (no bands in the range 100-1100  $\text{cm}^{-1}$ ) or as inclusions within minerals (additional bands in the range 100-1100  $\text{cm}^{-1}$ ). HRTEM investigations were conducted to detail at the sub-nanometric scale the structural organization of such refractory CM in both river and marine sediments; some representative photomicrographs are presented in Figure S4. In all samples, refractory CM is observed spanning the range from disordered graphitic CM to perfectly crystallized graphite. Microtexture of this CM is heterogeneous, from porous to lamellar CM, but is highly similar to the variety of microtexture observed in CM extracted from metamorphic rocks<sup>35,37</sup>.

## Source of $C_{org}$ in Bengal Fan sediments

The relative proportions of terrestrial and marine  $C_{org}$  in Bengal Fan sediments have already been evaluated in several studies following different approaches<sup>20-22,31,38</sup>. All concluded that  $C_{org}$  stored in Bengal Fan sediments is by far dominated by terrestrial inputs. The most recent and precise work used both n-alkanes relative abundance and isotopic composition in sediments from the distal Bengal Fan<sup>21</sup>. Here we use a similar approach for selected Channel-levee and Shelf sediments in order to confirm the terrestrial origin of the  $C_{org}$  in the studied sediments.

Odd C-numbered high molecular weight (HMW) n-alkanes (mainly  $C_{27}$  to  $C_{33}$ ) are produced in the leaves of vascular higher plants and are therefore univocal tracers of terrestrial  $C_{org}$ <sup>39</sup>. Marine algae and phytoplankton do not significantly produce HMW n-alkanes and their n-alkanes distribution is dominated by low molecular weight odd C-numbered n-alkanes ( $C_{15}$ ,  $C_{17}$  and  $C_{19}$ )<sup>39</sup>. We analysed n-alkane abundance in river and Bengal Fan sediments. HMW n-alkanes are dominant in both types of sediments with a strong predominance of odd over even compounds. This is illustrated by elevated values of the Carbon Preference Index (CPI)<sup>40</sup>. CPI ranges from 1.8 to 5.0 in river sediments and from 2.5 to 5.2 in oceanic sediments (Table S3). CPI above 2 is typical of terrestrial higher plants. The comparatively low CPI value (1.8) of the bed sediment MO 217 associated with relatively high proportions of LMW n-alkanes indicates a significant proportion of fossil  $C_{org}$ , which is consistent with its low TOC and  $\Delta^{14}C$  values.

Another line of evidence is provided by the comparison of carbon isotopic composition ( $\delta^{13}C$ ) of bulk  $C_{org}$  and individual n-alkanes. Bulk  $C_{org}$   $\delta^{13}C$  in Bengal fan sediments is highly variable between -25 and -15 ‰<sup>20</sup>. Such large range has been attributed to variations in the proportion of C3 and C4 plants in the continental basin<sup>20,41</sup>. Freeman and

Collaruso<sup>21</sup> showed that  $\delta^{13}\text{C}$  of odd C-numbered HNW n-alkanes co-vary with that of bulk  $\text{C}_{\text{org}}$ . This linear correlation implies a strong influence of vascular plants on bulk  $\text{C}_{\text{org}}$   $\delta^{13}\text{C}$  and minor contributions from bacteria or phytoplankton. Our river and marine samples reinforce this relationship (figure S5). The 5 ‰ variability in bulk  $\delta^{13}\text{C}$  of our samples results from differences in C3-C4 vegetation between Ganga and Brahmaputra basins for river sediments, and over time for marine sediments<sup>42</sup>. Finally, the  $\delta^{13}\text{C}$  offset between TOC and higher plants biomarker n-alkane is between 7 and 10 ‰ (table S3). This is consistent with the range reported by Collister et al.<sup>43</sup> for vascular plants. The offset is also constant from river to marine sediments, which is consistent with no significant addition of marine  $\text{C}_{\text{org}}$ .

The high CPI of marine sediments, the low abundance of  $\text{C}_{15}$ ,  $\text{C}_{17}$  and  $\text{C}_{19}$ , the similarity of the n-alkane distribution between river and marine sediments, and stable  $\delta^{13}\text{C}$  offset between TOC and higher plants biomarker n-alkanes, all support that only negligible proportion of marine  $\text{C}_{\text{org}}$  is incorporated during sedimentation in the Bay of Bengal.

## Supplementary Notes

- 36 Beyssac, O., Bollinger, L., Avouac, J.-P., & Goffe, B., Thermal metamorphism in the lesser Himalaya of Nepal determined from Raman spectroscopy of carbonaceous material. *Earth and Planetary Science Letters* **225** (1-2), 233-241 (2004).
- 37 Buseck, P. R. & Huang, B.-J., Conversion of carbonaceous material to graphite during metamorphism. *Geochimica et Cosmochimica Acta* **49** (10), 2003-2016 (1985).
- 38 Poynter, J. & Eglinton, G., in Proc. ODP, Sci. Res., edited by Cochran, J. R., Stow, D. A. V., and al., e. (Ocean Drilling Program, College station TX, 1990), Vol. 116, pp. 155-161.
- 39 Peters, K. E. & Moldowan, J. M., *The Biomarker Guide: Interpreting molecular fossils in petroleum and ancient sediments.* (Prentice-Hall, Inc., Englewood Cliffs, 1993).
- 40 Eglinton, G. & Hamilton, R. J., Leaf epicuticular waxes. *Science* **156** (780), 1322-1335 (1967).
- 41 Quade, J., Cater, J. M. L., Ojha, T. P., Adam, J., & Harrison, T. M., Late Miocene environmental change in Nepal and the northern Indian subcontinent: stable isotopic evidence from paleosols. *Geological Society of America Bulletin* **107** (12), 1381-1397 (1995).
- 42 Galy, V. et al., C4 plants decline in the Himalayan basin since the Last Glacial Maximum. *Quaternary Science Reviews* (Submitted).
- 43 Collister, J. W., Rieley, G., Stern, B., Eglinton, G., & Fry, B., Compound-specific  $\delta^{13}\text{C}$  analyses of leaf lipids from plants with differing carbon dioxide metabolisms. *Organic Geochemistry* **21** (6-7), 619-627 (1994).

## Supplementary Figures

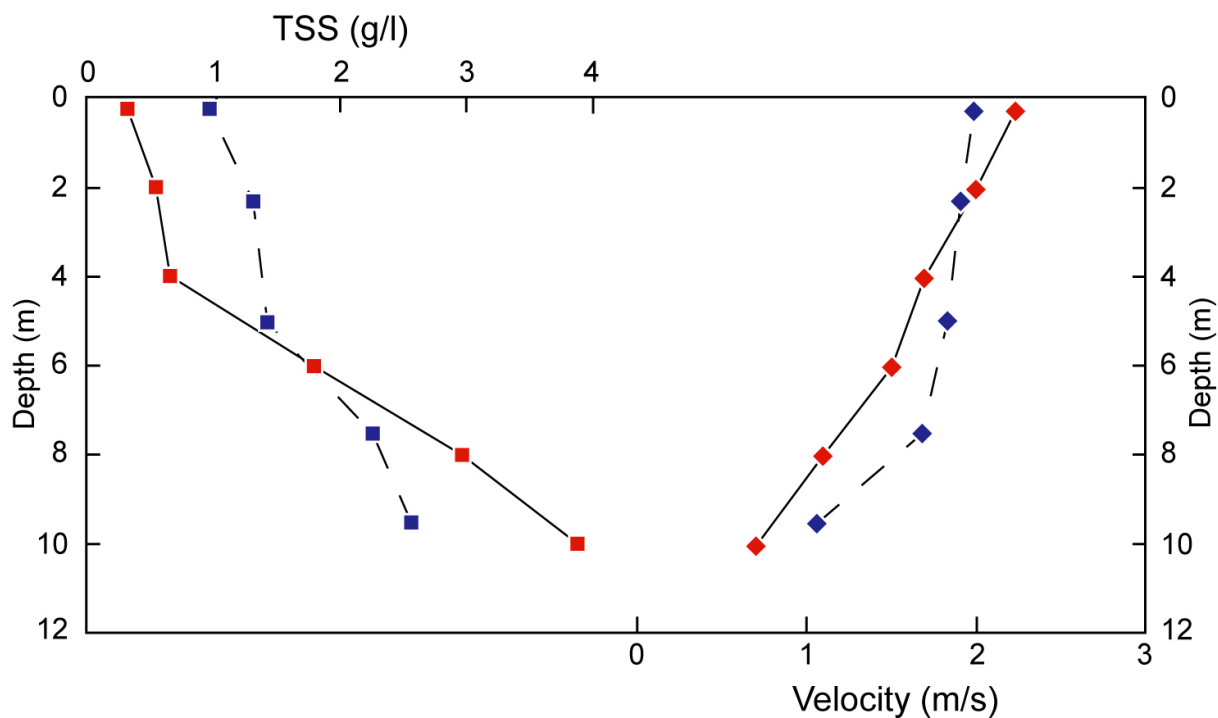

Supplementary Figure 1: Flow velocity (diamonds) and total suspended sediment concentration (squares) of the Lower Meghna main channel during the 2004 (red) and 2005 (blue) monsoon. 2 sd. uncertainties on TSS and flow velocity are respectively 0.05 g/l and 0.1 m/s. Velocity and TSS gradients are opposed and characterise the strong heterogeneity of the river section. Average suspended sediment transported by the river corresponds to the integration of velocity, TSS, and composition gradients on the whole river depth.

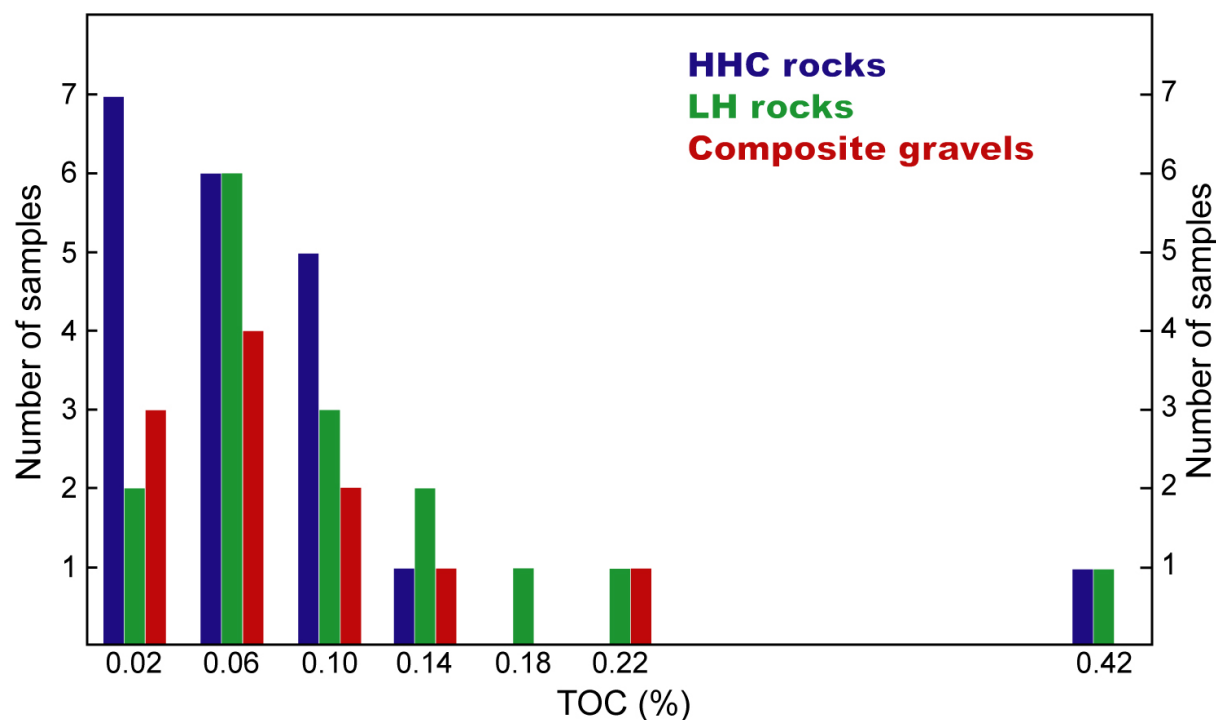

Supplementary Figure 2: Total organic carbon content of Himalayan source rocks and river gravels. Rocks from the High Himalaya Crystalline (HHC) and the Lesser Himalaya (LH) have an average TOC of 0.06 and 0.10 % respectively. Mean TOC of the eroding source rock was calculated on the basis of relative contributions of HHC and LH formations (respectively 80 and 20 %) estimated using Sr and Nd isotopes<sup>8</sup>. River gravels are bed sediments of Himalayan rivers sieved to eliminate the <2 mm fraction and cleaned with H<sub>2</sub>O<sub>2</sub>. Each sample corresponds to the integration of the TOC variability over the different lithologies eroded by the river (more than 500 gravels). Average TOC estimated from individual source rock and composite gravels are consistently between 0.05 and 0.08 %.

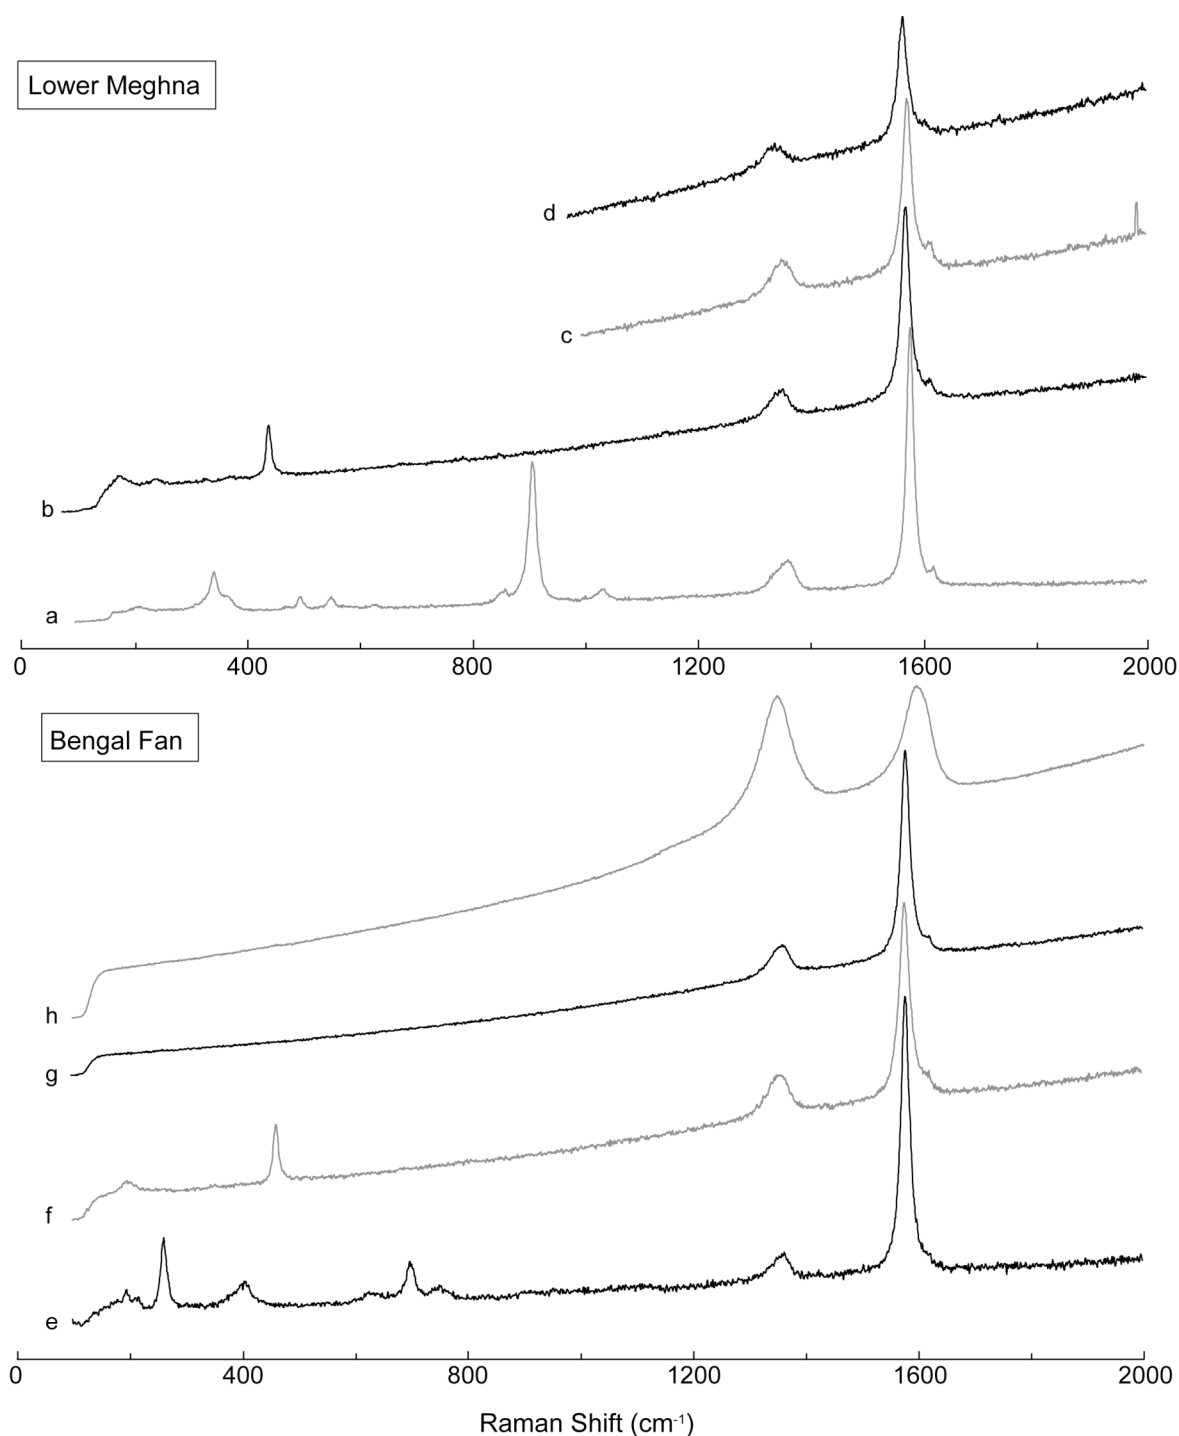

Supplementary Figure 3: Representative Raman spectra of carbonaceous material (CM) observed in bed and suspended sediments of the Lower Meghna (top) and in marine sediments from the Bengal Shelf and Channel-levee system (bottom). a: Polycrystalline graphite inclusion in garnet. b,f: Polycrystalline graphite inclusion in quartz (Si-O stretching mode at ca.  $464\text{ cm}^{-1}$ ). c,d: Polycrystalline graphite. e: Polycrystalline graphite inclusion in mica. g: Polycrystalline graphite, isolated particle. h: Poorly ordered CM, isolated particle.

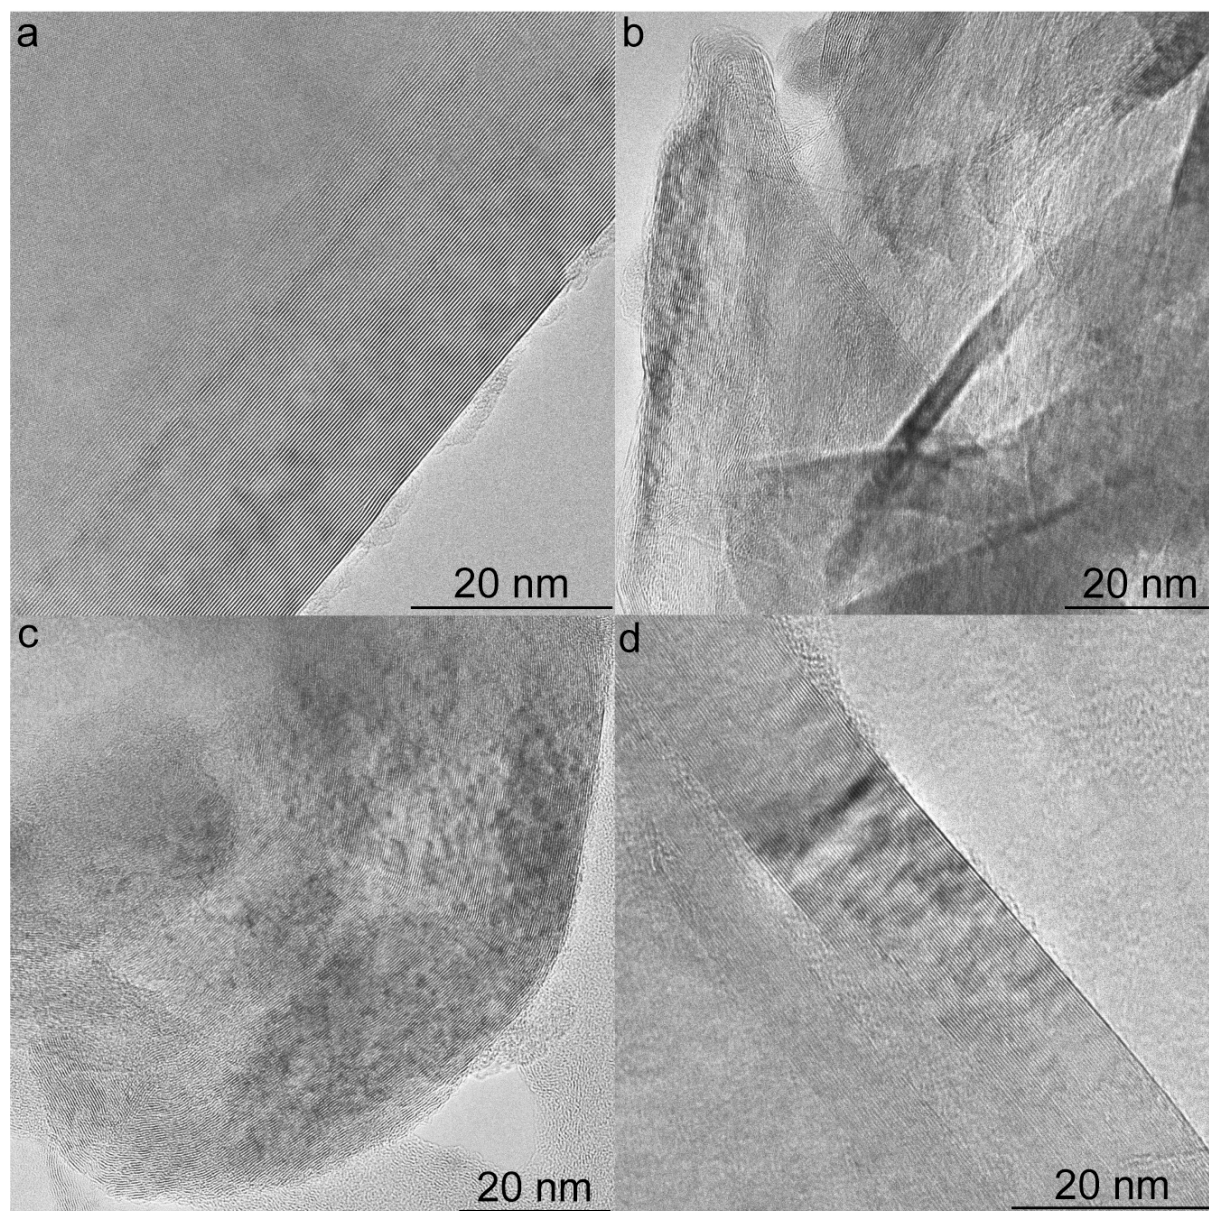

Supplementary Figure 4: Transmission Electron Microscopy photomicrograph of graphitized C<sub>org</sub> observed in surface suspended sediments of the Brahmaputra (a), Ganga (b) and Lower Meghna (c-d). These 002 lattice fringes images directly represent the profile of the aromatic layers in such carbonaceous materials.



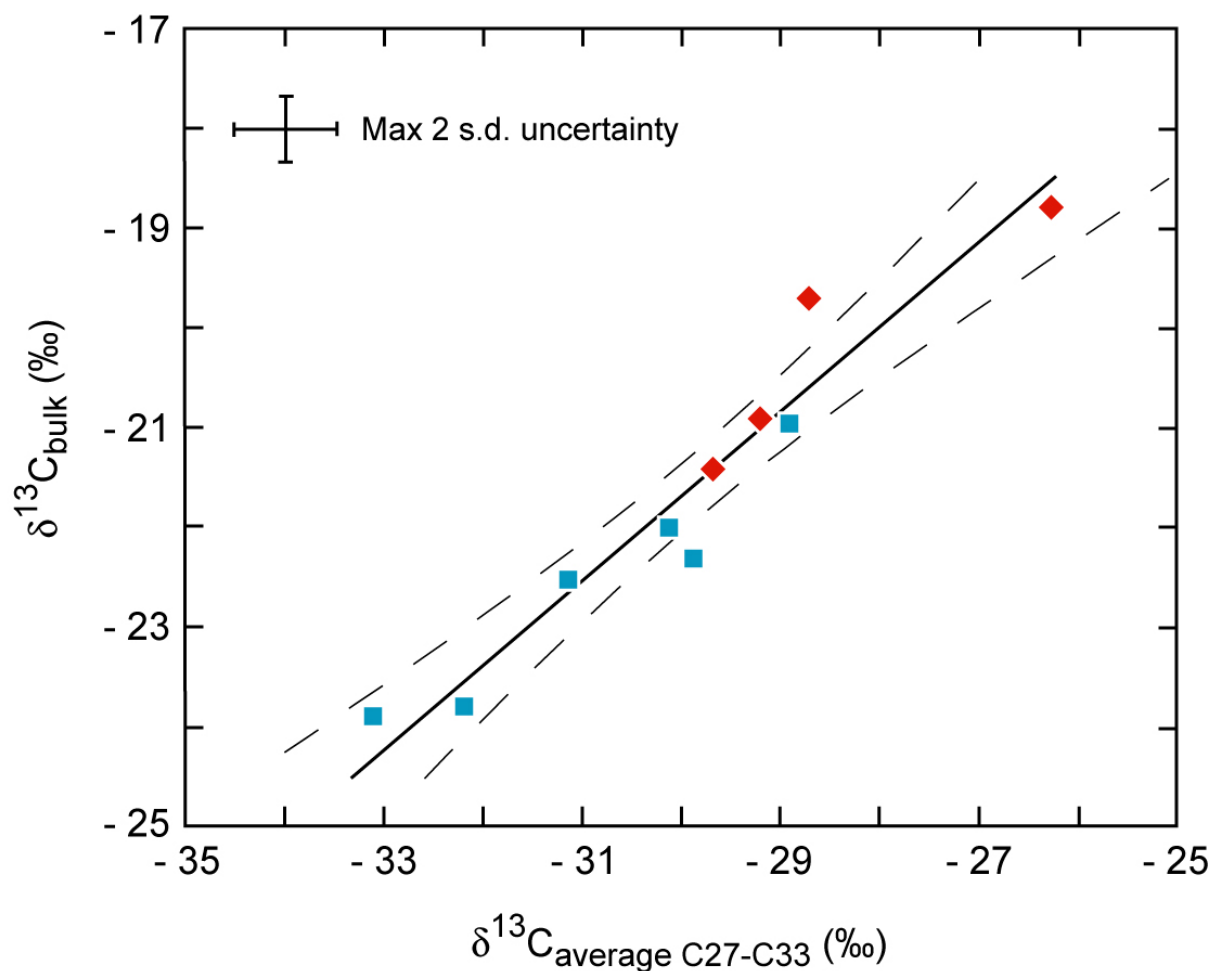

Supplementary Figure 5:  $\delta^{13}\text{C}$  of higher plant biomarkers as a function of bulk  $\text{C}_{\text{org}}$  isotopic composition. Odd C-numbered high molecular weight n-alkanes ( $\text{C}_{27}\text{-C}_{29}\text{-C}_{31}\text{-C}_{33}$ ) are univocal tracers of terrestrial higher plants. Their weighted average isotopic composition is positively correlated with bulk  $\text{C}_{\text{org}}$  isotopic composition. The black line represents the best fit of the whole dataset and the dashed curves define the 95 % confidence interval. G-B river (blue squares) and Bengal Fan (red diamonds) sediments define a unique trend showing that marine  $\text{C}_{\text{org}}$  contribution is minor in the later.

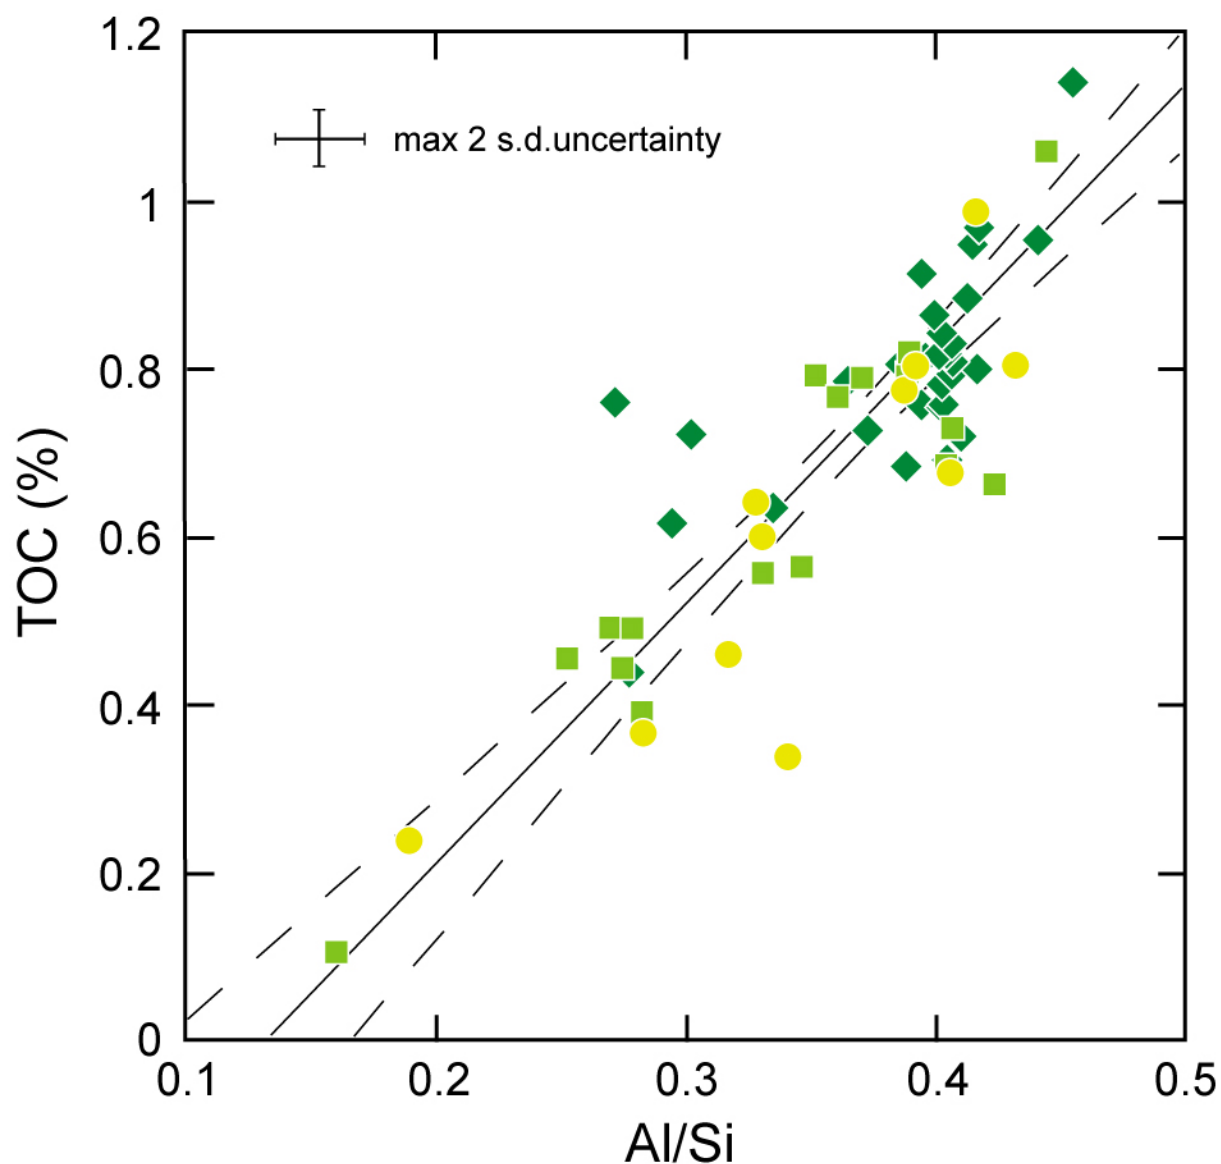

Supplementary Figure 6: Total  $C_{\text{org}}$  content of sediments from the Bengal shelf (yellow dots), Channel-levee system (green diamonds) and deep Fan (green squares) as a function of their Al/Si ratio. Best fit and 95% confidence interval are shown for the whole data set. Sediments from the different parts of the Bengal Fan define similar positive trends, indicating comparable  $C_{\text{org}}$  loading in every parts of the Fan. This implies that  $C_{\text{org}}$  oxidation is minor during the sediment transfer from the shelf to the channel-levee and to the deep Fan.

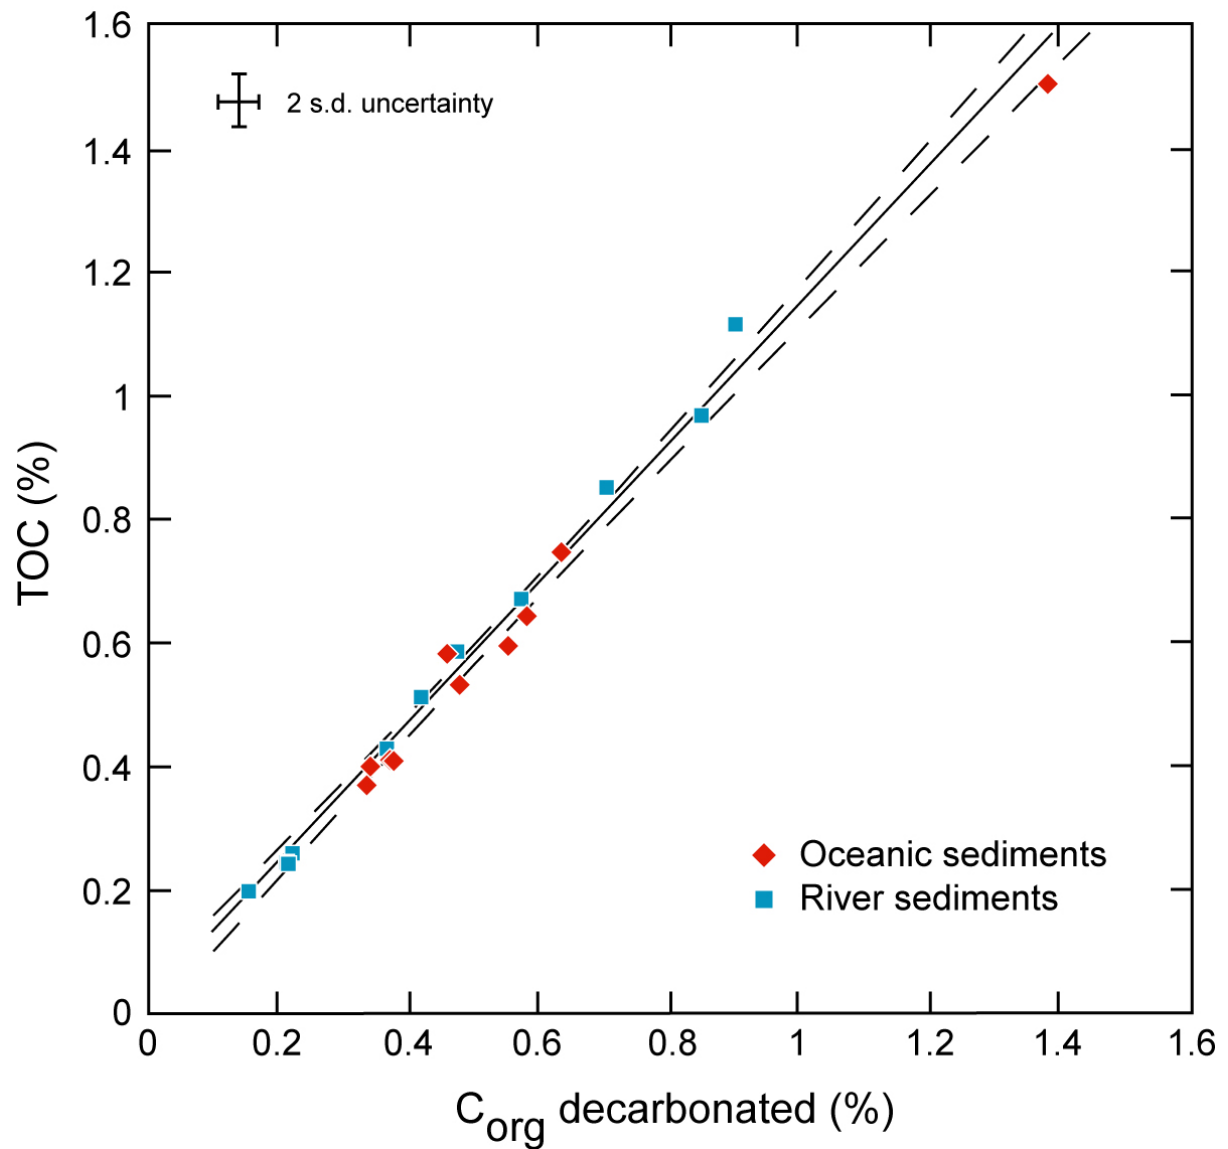

Supplementary Figure 7:  $C_{org}$  content determined on decarbonated fractions as a function of total organic carbon content (TOC). River and oceanic sediments define a unique trend showing that the proportion of  $C_{org}$  solubilized during the decarbonation is quite constant and comparable in these 2 types of sediment.

Table S1: TSS, Al/Si, TOC and  $\Delta^{14}\text{C}$  of river sediments and gravels

| Sample | River       | Location       | Type     | Date     | TSS<br>g/l | Al/Si<br>at | TOC<br>% | acid-insoluble $\text{C}_{\text{org}}$<br>‰ | $\Delta^{14}\text{C}$ |
|--------|-------------|----------------|----------|----------|------------|-------------|----------|---------------------------------------------|-----------------------|
| BR 212 |             |                | SL 1m    |          | 0.57       | 0.38        | 0.66     |                                             |                       |
| BR 211 |             |                | SL 3.5m  |          | 0.75       | 0.34        | 0.62     |                                             |                       |
| BR 209 |             |                | SL 5m    | 16/07/02 | 0.71       | 0.35        | 0.67     |                                             |                       |
| BR 208 |             |                | SL 10m   |          | 0.74       | 0.34        | 0.62     | -311                                        |                       |
| BR 210 |             |                | SL 17m   |          | 1.25       | 0.28        | 0.47     | -363                                        |                       |
| BR 214 |             |                | BL       |          |            | 0.14        | 0.10     | -434                                        |                       |
| BR 417 |             |                | SL surf  |          |            | 0.38        | 0.53     |                                             |                       |
| BR 415 |             |                | SL surf  |          | 0.77       | 0.38        | 0.53     | -259                                        |                       |
| BR 414 |             |                | SL 2m    |          | 1.02       | 0.33        | 0.46     | -254                                        |                       |
| BR 413 |             |                | SL 4m    |          | 1.31       | 0.29        | 0.42     | -284                                        |                       |
| BR 412 |             |                | SL 6.5m  |          | 1.48       | 0.28        | 0.38     |                                             |                       |
| BR 411 |             |                | SL 9m    | 13/07/04 | 2.93       | 0.21        | 0.22     | -294                                        |                       |
| BR 418 |             |                | BL       |          |            | 0.13        | 0.03     | -814                                        |                       |
| BR 419 | Ganga       | Harding bridge | Bank     |          |            | 0.19        | 0.15     |                                             |                       |
| BR 420 |             |                | Bank     |          |            | 0.26        | 0.33     |                                             |                       |
| BR 421 |             |                | Bank     |          |            | 0.22        | 0.28     |                                             |                       |
| BR 422 |             |                | Bank     |          |            | 0.21        | 0.33     |                                             |                       |
| BR 515 |             |                | SL surf  |          | 0.94       | 0.37        | 0.71     |                                             |                       |
| BR 514 |             |                | SL 2.5m  |          | 1.42       | 0.32        | 0.57     |                                             |                       |
| BR 513 |             |                | SL 5m    |          | 1.71       | 0.28        | 0.45     |                                             |                       |
| BR 512 |             |                | SL 7m    |          | 1.81       | 0.27        | 0.42     |                                             |                       |
| BR 511 |             |                | SL 10m   |          | 2.44       | 0.24        | 0.32     |                                             |                       |
| BR 516 |             |                | BL       | 23/07/05 |            | 0.13        | 0.05     | -712                                        |                       |
| BR 519 |             |                | SL surf  |          | 0.66       | 0.41        | 0.82     |                                             |                       |
| BR 518 |             |                | SL 5m    |          | 1.53       | 0.31        | 0.53     |                                             |                       |
| BR 517 |             |                | SL 9.8m  |          | 1.81       | 0.28        | 0.47     |                                             |                       |
| BR 520 |             |                | BL       |          |            | 0.17        | 0.14     |                                             |                       |
| BR 522 |             |                | SL surf  |          |            | 0.40        | 0.71     | -215                                        |                       |
| BR 205 |             |                | SL 0.5m  |          | 1.18       | 0.31        | 0.57     |                                             |                       |
| BR 204 |             |                | SL 2m    |          |            | 0.27        | 0.53     |                                             |                       |
| BR 201 |             |                | SL 6m    |          |            | 0.26        | 0.52     |                                             |                       |
| BR 202 |             |                | SL 9.5m  | 15/07/02 | 1.44       | 0.21        | 0.29     |                                             |                       |
| BR 203 |             |                | SL 11.5m |          | 5.89       | 0.19        | 0.14     |                                             |                       |
| BR 206 |             |                | BL       |          |            | 0.20        | 0.06     |                                             |                       |
| BR 207 |             |                | SL 1m    |          |            | 0.23        | 0.25     |                                             |                       |
| BR 401 |             |                | SL 6.5m  | 11/07/04 | 4.34       | 0.23        | 0.26     |                                             |                       |
| BR 405 |             |                | SL 5m    |          | 6.00       | 0.22        | 0.22     |                                             |                       |
| BR 406 |             |                | SL 3m    |          | 3.13       | 0.24        | 0.32     |                                             |                       |
| BR 407 |             |                | SL 11m   | 12/07/04 | 6.39       | 0.22        | 0.26     |                                             |                       |
| BR 408 |             |                | SL 1.5m  |          | 1.82       | 0.29        | 0.44     |                                             |                       |
| BR 409 |             |                | SL surf  |          | 1.32       | 0.32        | 0.54     |                                             |                       |
| BR 402 |             |                | SL surf  |          |            | 0.32        | 0.50     |                                             |                       |
| BR 459 |             |                | SL surf  |          |            | 0.37        | 0.64     |                                             |                       |
| BR 457 | Brhamaputra | Sirajganj      | SL surf  |          | 1.34       | 0.36        | 0.69     | -340                                        |                       |
| BR 456 |             |                | SL 3m    |          | 2.94       | 0.28        | 0.45     | -395                                        |                       |
| BR 455 |             |                | SL 6m    | 23/07/04 | 2.45       | 0.29        | 0.50     |                                             |                       |
| BR 454 |             |                | SL 9m    |          | 6.20       | 0.22        | 0.29     | -421                                        |                       |
| BR 460 |             |                | BL       |          |            | 0.17        | 0.04     | -769                                        |                       |
| BR 450 |             |                | BL       |          |            | 0.31        | 0.68     |                                             |                       |
| BR 453 |             |                | BL       |          |            | 0.22        | 0.19     |                                             |                       |
| BR 500 |             |                | SL surf  | 21/07/05 |            | 0.31        | 0.62     | -474                                        |                       |
| BR 501 |             |                | SL 6.5m  |          | 1.99       | 0.29        | 0.51     |                                             |                       |
| BR 502 |             |                | SL 2.5m  |          | 0.77       | 0.33        | 0.59     |                                             |                       |
| BR 503 |             |                | BL       |          |            | 0.18        | 0.11     |                                             |                       |
| BR 504 |             |                | SL 9.8m  |          | 2.29       | 0.25        | 0.37     |                                             |                       |
| BR 505 |             |                | SL 7m    | 22/07/05 | 2.13       | 0.27        | 0.40     |                                             |                       |
| BR 506 |             |                | SL 5m    |          | 1.57       | 0.29        | 0.49     |                                             |                       |
| BR 507 |             |                | SL 2.75m |          | 1.38       | 0.32        | 0.53     |                                             |                       |
| BR 508 |             |                | SL surf  |          | 0.77       | 0.36        | 0.64     |                                             |                       |
| BR 509 |             |                | BL       |          |            | 0.15        | 0.05     |                                             |                       |

TSS: total suspended sediment, SL: suspended load with depth of sampling, BL: bedload

Table S1 (continued from previous page)

| Sample | River           | Location    | Type    | Date     | TSS<br>g/l | Al/Si<br>at | TOC<br>% | acid-insoluble C <sub>org</sub><br>‰ | $\Delta^{14}\text{C}$ |
|--------|-----------------|-------------|---------|----------|------------|-------------|----------|--------------------------------------|-----------------------|
| BR 528 |                 |             | SL surf |          | 0.99       | 0.35        | 0.67     |                                      |                       |
| BR 527 |                 |             | SL 2.3m |          | 1.31       | 0.31        | 0.56     |                                      |                       |
| BR 526 |                 |             | SL 5m   |          | 1.43       | 0.29        | 0.48     |                                      |                       |
| BR 524 |                 | Mawa        | SL 7.5m | 24/7/05  | 2.25       | 0.24        | 0.38     |                                      |                       |
| BR 525 |                 |             | SL 9.5m |          | 2.56       | 0.24        | 0.33     |                                      |                       |
| BR 529 |                 |             | BL      |          |            | 0.15        | 0.06     |                                      |                       |
| BR 218 |                 |             | SL 1.5m |          | 0.36       | 0.36        | 0.71     |                                      |                       |
| BR 220 |                 |             | SL 3m   |          | 0.84       | 0.28        | 0.59     |                                      |                       |
| BR 217 | Lower Meghna    |             | SL 5m   | 18/07/02 | 0.50       | 0.30        | 0.50     |                                      |                       |
| BR 216 |                 |             | SL 10m  |          | 1.67       | 0.21        | 0.27     |                                      |                       |
| BR 219 |                 |             | BL      |          |            | 0.20        | 0.04     |                                      |                       |
| BR 448 |                 |             | SL surf |          |            |             | 0.34     | 0.59                                 |                       |
| BR 441 |                 | Bhola       | SL surf |          | 0.33       | 0.39        | 0.80     | -421                                 |                       |
| BR 444 |                 |             | SL 2m   |          | 0.55       | 0.34        | 0.63     |                                      |                       |
| BR 442 |                 |             | SL 4m   | 18/07/04 | 0.67       | 0.33        | 0.58     |                                      |                       |
| BR 440 |                 |             | SL 6m   |          | 1.79       | 0.26        | 0.42     |                                      |                       |
| BR 439 |                 |             | SL 8m   |          | 2.97       | 0.23        | 0.40     |                                      | -370                  |
| BR 445 |                 |             | SL 10m  |          | 3.88       | 0.26        | 0.57     |                                      |                       |
| BR 446 |                 |             | BL      |          |            | 0.16        | 0.05     |                                      | -710                  |
| PB 5   | Kali Gandaki    | Jomsom      |         |          |            | 0.11        | 0.20     |                                      |                       |
| PB 19  | Lete Kola       | confluence  |         |          |            | 0.20        | 0.01     |                                      |                       |
| PB 22  | Rukse Kola      | confluence  |         |          |            | 0.18        | 0.08     |                                      |                       |
| PB 28  | Miristi Kola    | confluence  |         |          |            | 0.20        | 0.02     |                                      |                       |
| MO 94  | Jarang          | Muchchok    |         |          |            | 0.08        | 0.02     |                                      |                       |
| MO 102 | Marsel Kola     | confluence  | gravels |          |            | 0.14        | 0.02     |                                      |                       |
| MO 112 | Isul kola       | confluence  |         |          |            | 0.08        | 0.07     |                                      |                       |
| MAR 3  | Marsyandi       | Krishnebhir |         |          |            | 0.30        | 0.10     |                                      |                       |
| AR 25  | Tenga tributary |             |         |          |            | 0.15        | 0.02     |                                      |                       |
| AR 32  | Tenga tributary |             |         |          |            | 0.15        | 0.04     |                                      |                       |
| AR 67  | Manas tributary |             |         |          |            | 0.17        | 0.05     |                                      |                       |

TSS: total suspended sediment, SL: suspended load with depth of sampling, BL: bedload

Table S2: Al/Si and TOC of Bengal Fan sediments

| Core  | Depth<br>cm | Location      | Dep. Age<br>yrs | Al/Si<br>at | TOC<br>% |      |
|-------|-------------|---------------|-----------------|-------------|----------|------|
| 19KL  | 73          | Deep fan      |                 | 0.16        | 0.10     |      |
|       | 154         |               |                 | 0.44        | 1.06     |      |
| 27KL  | 631         |               | 9085            | 0.42        | 0.66     |      |
|       | 711         |               | 10236           | 0.39        | 0.80     |      |
| 40KL  | 726         |               | 10452           | 0.37        | 0.79     |      |
|       | 172         |               |                 | 0.40        | 0.69     |      |
|       | 196         |               |                 | 0.41        | 0.73     |      |
|       | 216         |               |                 | 0.35        | 0.56     |      |
|       | 229         |               |                 | 0.28        | 0.39     |      |
|       | 243         |               |                 | 0.27        | 0.44     |      |
|       | 381         |               |                 | 0.33        | 0.56     |      |
|       | 394         |               |                 | 0.27        | 0.49     |      |
| 47KL  | 622         |               | 0.25            | 0.45        |          |      |
|       | 728         |               | 0.28            | 0.49        |          |      |
| 51KL  | 207         |               | 0.36            | 0.77        |          |      |
|       | 304         |               | 0.35            | 0.79        |          |      |
| 86KL  | 482         |               | 0.39            | 0.82        |          |      |
|       | 40          |               | 11              | 0.33        | 0.64     |      |
|       | 819         |               | 234             | 0.42        | 0.99     |      |
|       | 96KL        | 79            |                 | 2           | 0.28     | 0.37 |
|       |             | 1109          |                 | 29          | 0.43     | 0.80 |
|       | 105KL       | 81            | Shelf           | 45          | 0.34     | 0.34 |
|       |             | 282           |                 | 157         | 0.41     | 0.68 |
|       |             | 568           |                 | 316         | 0.33     | 0.60 |
|       |             | 669           |                 | 371         | 0.39     | 0.80 |
|       |             | 682           |                 | 379         | 0.32     | 0.46 |
|       |             | 688           |                 | 382         | 0.19     | 0.24 |
|       | 117KL       | 762           |                 | 423         | 0.39     | 0.77 |
| 725   |             |               | 11524           | 0.40        | 0.81     |      |
| 774   |             |               | 11829           | 0.39        | 0.76     |      |
| 822   |             |               | 12128           | 0.41        | 0.72     |      |
| 925   |             |               | 12769           | 0.39        | 0.91     |      |
| 932   |             |               | 12812           | 0.42        | 0.95     |      |
| 972   |             |               | 13061           | 0.39        | 0.81     |      |
| 1029  |             |               | 13416           | 0.40        | 0.84     |      |
| 1109  |             |               | 13914           | 0.40        | 0.78     |      |
| 118KL |             | 29            |                 | 291         | 0.40     | 0.86 |
|       |             | 580           |                 | 5742        | 0.39     | 0.69 |
|       |             | 657           |                 | 5907        | 0.40     | 0.82 |
|       | 920         |               | 6474            | 0.29        | 0.62     |      |
|       | 1144        |               | 6956            | 0.34        | 0.64     |      |
|       | 54          |               | 1144            | 0.44        | 0.95     |      |
|       | 84          | Channel-levee | 1779            | 0.41        | 0.83     |      |
|       | 141         |               | 2987            | 0.37        | 0.73     |      |
| 348   | 6924        |               | 0.45            | 1.14        |          |      |
| 412   | 8133        |               | 0.42            | 0.80        |          |      |
| 120KL | 556         |               | 9593            | 0.41        | 0.81     |      |
|       | 579         |               | 9607            | 0.30        | 0.72     |      |
|       | 593         |               | 9615            | 0.27        | 0.76     |      |
|       | 702         |               | 9683            | 0.41        | 0.88     |      |
|       | 763         |               | 10001           | 0.40        | 0.82     |      |
|       | 849         |               | 10785           | 0.36        | 0.79     |      |
|       | 864         |               | 10926           | 0.42        | 0.97     |      |
|       | 960         |               | 11844           | 0.41        | 0.80     |      |
|       | 966         |               | 11901           | 0.40        | 0.76     |      |
|       | 1031        |               | 12523           | 0.40        | 0.76     |      |
| 1071  |             | 13470         | 0.29            | 0.77        |          |      |
| 1107  |             | 15661         | 0.40            | 0.69        |          |      |
| 1114  |             | 16088         | 0.28            | 0.44        |          |      |

Deposition age were estimated as explained in the "Methods" supplementary section.

Table S3: n-alkanes relative abundance and isotopic composition of Bengal Fan and river sediments

| Sample                | Type | Location      | C14 | C15 | C16 | C17  | C18  | C19 | C20 | C21 | C22  | C23 | C24 | C25 | C26 | C27  | C28 | C29  | C30 | C31  | C32 | C33  | C34 | C35 | $\delta^{13}\text{C}_{\text{bulk}}$ | $\delta^{13}\text{C}_{\text{C}_{27}\text{-C}_{33}}$ | M/T  | CPI |
|-----------------------|------|---------------|-----|-----|-----|------|------|-----|-----|-----|------|-----|-----|-----|-----|------|-----|------|-----|------|-----|------|-----|-----|-------------------------------------|-----------------------------------------------------|------|-----|
|                       |      |               | %   | %   | %   | %    | %    | %   | %   | %   | %    | %   | %   | %   | %   | %    | %   | %    | %   | %    | %   | %    | %   | %   | ‰                                   | ‰                                                   |      |     |
| SO 93 120KL 138-144   | OS   | Channel-levee | 0.0 | 0.4 | 0.5 | 1.6  | 0.9  | 1.3 | 1.1 | 1.6 | 1.3  | 2.3 | 1.6 | 4.0 | 2.3 | 8.9  | 3.2 | 17.7 | 3.5 | 23.3 | 3.0 | 15.3 | 1.3 | 4.7 | -21.4                               | -29.7                                               | 0.05 | 5.2 |
| SO 93 120KL 591-596   |      |               | 0.1 | 0.9 | 1.0 | 3.4  | 1.5  | 1.8 | 1.4 | 2.3 | 1.9  | 3.2 | 2.2 | 4.6 | 2.6 | 9.1  | 3.6 | 15.6 | 3.3 | 20.5 | 2.8 | 13.1 | 1.3 | 4.0 | -19.7                               | -28.7                                               | 0.10 | 4.5 |
| SO 93 120KL 848-853   |      |               | 0.0 | 0.3 | 0.5 | 1.8  | 1.0  | 1.3 | 1.1 | 1.9 | 1.5  | 2.9 | 1.8 | 4.7 | 2.6 | 9.2  | 3.8 | 15.7 | 3.7 | 22.9 | 3.3 | 14.2 | 1.3 | 4.2 | -20.9                               | -29.2                                               | 0.06 | 4.5 |
| SO 93 120KL 1104-1111 |      |               | 0.0 | 0.2 | 0.7 | 2.4  | 0.9  | 1.1 | 1.1 | 1.7 | 1.5  | 3.4 | 2.2 | 5.8 | 3.5 | 12.9 | 4.0 | 17.6 | 3.2 | 19.4 | 2.3 | 12.3 | 0.8 | 3.1 | -18.8                               | -26.3                                               | 0.06 | 4.7 |
| SO 93 105KL 77-86     | OS   | Shelf         | 0.0 | 0.0 | 0.0 | 0.3  | 0.1  | 0.3 | 0.6 | 1.2 | 1.9  | 3.4 | 4.0 | 6.2 | 5.6 | 9.7  | 5.6 | 13.9 | 5.3 | 17.5 | 4.1 | 12.4 | 2.2 | 5.5 | -21.5                               | n.d.                                                | 0.01 | 2.5 |
| SO 93 105KL 279-285   |      |               | 0.0 | 0.1 | 0.2 | 1.2  | 0.8  | 1.3 | 1.4 | 2.1 | 2.1  | 3.1 | 2.7 | 5.8 | 4.1 | 9.0  | 3.8 | 13.6 | 4.0 | 18.6 | 3.5 | 14.7 | 1.7 | 6.1 | -21.1                               | n.d.                                                | 0.05 | 3.5 |
| SO 93 105KL 564-572   |      |               | 0.0 | 0.0 | 0.1 | 0.5  | 0.5  | 1.1 | 1.3 | 2.2 | 2.3  | 3.4 | 3.5 | 6.1 | 4.7 | 9.1  | 4.6 | 14.5 | 4.5 | 19.2 | 3.6 | 12.7 | 1.5 | 4.6 | -20.9                               | n.d.                                                | 0.03 | 3.1 |
| SO 93 105KL 678-685   |      |               | 0.0 | 0.7 | 2.1 | 3.9  | 3.5  | 3.7 | 3.3 | 3.1 | 2.7  | 3.2 | 3.0 | 5.0 | 3.7 | 7.6  | 4.2 | 11.5 | 3.8 | 15.1 | 2.9 | 11.0 | 1.4 | 4.5 | -21.4                               | n.d.                                                | 0.18 | 3.0 |
| SO 93 105KL 758-765   |      |               | 0.0 | 0.1 | 0.4 | 1.4  | 1.0  | 1.4 | 1.5 | 2.0 | 2.1  | 3.5 | 3.7 | 6.7 | 5.3 | 8.9  | 4.7 | 12.0 | 4.4 | 16.2 | 3.8 | 13.0 | 2.1 | 5.9 | -21.7                               | n.d.                                                | 0.06 | 2.7 |
| MO 217                | BL   | Narayani      | 2.1 | 3.6 | 8.4 | 10.5 | 13.0 | 8.8 | 9.4 | 6.3 | 5.1  | 3.9 | 2.4 | 2.6 | 2.2 | 2.8  | 1.8 | 4.5  | 2.2 | 4.1  | 1.3 | 2.6  | 1.3 | 1.1 | -23.8                               | -32.2                                               | 1.64 | 1.8 |
| BR 325                | Bank | Ganga         | 0.8 | 0.4 | 1.4 | 1.0  | 1.8  | 0.8 | 2.3 | 1.6 | 1.3  | 2.6 | 1.6 | 4.1 | 2.3 | 8.6  | 3.0 | 18.6 | 3.3 | 22.5 | 3.3 | 12.9 | 1.5 | 4.4 | -22.0                               | -30.1                                               | 0.04 | 5.0 |
| BR 420                | Bank | Ganga         | 3.7 | 2.7 | 7.7 | 4.0  | 5.9  | 2.1 | 4.6 | 1.5 | 0.0  | 2.6 | 1.4 | 3.5 | 2.4 | 6.7  | 2.7 | 13.3 | 3.3 | 13.6 | 2.3 | 9.5  | 1.9 | 4.2 | -22.3                               | -29.9                                               | 0.2  | 3.8 |
| BR 417                | SL   | Ganga         | 0.3 | 0.3 | 0.3 | 1.8  | 1.7  | 2.2 | 4.1 | 4.3 | 6.3  | 5.5 | 2.7 | 3.3 | 2.5 | 7.2  | 4.0 | 13.1 | 4.9 | 14.8 | 4.1 | 9.3  | 2.6 | 4.5 | -21.0                               | -28.9                                               | 0.1  | 2.6 |
| BR 402                | SL   | Brahmaputra   | 1.1 | 1.5 | 1.8 | 4.5  | 3.8  | 4.3 | 5.2 | 7.8 | 11.8 | 9.9 | 4.4 | 3.8 | 1.9 | 4.8  | 2.4 | 8.0  | 2.5 | 9.2  | 2.0 | 5.9  | 1.1 | 2.2 | -22.5                               | -31.1                                               | 0.37 | 2.8 |
| BR 459                | SL   | Brahmaputra   | 0.5 | 1.2 | 1.6 | 4.3  | 3.7  | 4.3 | 5.2 | 7.2 | 10.4 | 8.6 | 3.6 | 3.7 | 1.7 | 4.9  | 1.9 | 10.0 | 2.2 | 13.0 | 1.9 | 7.4  | 0.7 | 2.2 | -23.9                               | -33.1                                               | 0.28 | 4.1 |
| BR 448                | SL   | Lower Meghna  | 1.3 | 1.8 | 2.0 | 4.7  | 3.5  | 4.0 | 4.8 | 6.1 | 8.7  | 7.6 | 3.7 | 3.8 | 2.1 | 4.8  | 3.1 | 8.8  | 3.3 | 10.8 | 3.0 | 7.1  | 1.8 | 3.1 | -23.0                               | n.d.                                                | 0.33 | 2.5 |

OS: oceanic sediment, SL: suspended load with depth of sampling, BL: bedload,  $\delta^{13}\text{C}_{\text{C}_{27}\text{-C}_{33}}$ : weighted average composition of  $\text{C}_{27}$ ,  $\text{C}_{29}$ ,  $\text{C}_{31}$  and  $\text{C}_{33}$  n-alkanes,

M/T: Relative proportions of  $(\text{C}_{15}+\text{C}_{17}+\text{C}_{19})$  and  $(\text{C}_{27}+\text{C}_{29}+\text{C}_{31}+\text{C}_{33})$  n-alkanes. CPI: Carbon Preference Index, calculated as described in Eglinton and Hamilton<sup>40</sup>.
